# Supplementary material
Source: publisher site journal article supplement (https://www.dovepress.com/article/273823)
Supplement: Supplementary file 1 [file get_supplementary_file.php]

Supplementary Table S1: Clinicopathological Characteristics of the enrolled patients.

| HCC grades | Sample number | Gender | Age (year) | HBV | HCV | Tumor Size (cm) | Child grade |
| --- | --- | --- | --- | --- | --- | --- | --- |
| G1 | 1 | Male | 60 | + | - | 5×4×3 | A |
| 2 | Male | 61 | + | - | 10×10 | A |
| 3 | Male | 61 | + | - | 7×8×7 | A |
| 4 | Male | 39 | + | - | 5×6×5 | A |
| 5 | Male | 69 | + | - | 3×3.3×3.6 | A |
| G2 | 1 | Female | 65 | + | - | 6.2×5.2×4.7 | A |
| 2 | Male | 59 | + | - | 6×6×6 | A |
| 3 | Male | 37 | + | - | 12×10 | A |
| 4 | Male | 51 | + | - | 7×6×6 | A |
| 5 | Male | 42 | + | - | 4×4 | A |
| G3 | 1 | Male | 66 | + | - | 4×4.5 | A |
| 2 | Male | 38 | + | - | 2.5×2.2 | A |
| 3 | Male | 46 | + | - | 4×6 | A |
| 4 | Male | 48 | + | - | 2.4×1.7 | A |
| 5 | Male | 58 | + | - | 5.2×4.2×2.9 | A |

Supplementary Table S2: List of differentially expressed proteins between HCC tumor and HCC adjacent non-tomor.

| **Checked** | **Protein FDR Confidence** | **Master** | **Unique Sequence ID** | **Accession** | **Exp. q-value** | **Contaminant** | **Coverage [%]** | **# Peptides** | **# Unique Peptides** | **# AAs** | **MW [kDa]** | **calc. pI** | **Score Sequest HT** | **Ensembl Gene ID** | **Gene Symbol** | **HCC/HCC non-tumor Abundance Ratio** | **HCC/HCC non-tumor Abundance Ratio P-Value** |
| --- | --- | --- | --- | --- | --- | --- | --- | --- | --- | --- | --- | --- | --- | --- | --- | --- | --- |
| TRUE | High | Master Protein | -4.7E+18 | P11712 | 0 | FALSE | 4 | 2 | 2 | 490 | 55.6 | 7.91 | 10.01 | ENSG00000138109.9 | CYP2C9 | 0.118 | 0.010820175 |
| TRUE | High | Master Protein | -3.2E+18 | P02452 | 0.002 | FALSE | 1 | 1 | 1 | 1464 | 138.9 | 5.8 | 5.66 |  | COL1A1 | 0.204 | 0.003173455 |
| TRUE | High | Master Protein | -8.8E+18 | Q14914 | 0 | FALSE | 22 | 5 | 5 | 329 | 35.8 | 8.29 | 34.87 | ENSG00000106853.18 | PTGR1 | 0.238 | 0.000174055 |
| TRUE | High | Master Protein | -8.4E+18 | P30039 | 0 | FALSE | 18 | 4 | 4 | 288 | 31.8 | 6.52 | 18.4 | ENSG00000108187.15 | PBLD | 0.267 | 0.047953629 |
| TRUE | High | Master Protein | 9.19E+18 | P00326 | 0 | FALSE | 29 | 11 | 2 | 375 | 39.8 | 8.29 | 157.31 | ENSG00000248144.5 | ADH1C | 0.268 | 0.007141797 |
| TRUE | High | Master Protein | 2.73E+18 | P08123 | 0 | FALSE | 3 | 3 | 3 | 1366 | 129.2 | 8.95 | 29.59 | ENSG00000164692.17 | COL1A2 | 0.275 | 0.00128723 |
| TRUE | High | Master Protein | 7.01E+18 | P17516 | 0 | FALSE | 11 | 5 | 1 | 323 | 37 | 6.93 | 26.92 | ENSG00000198610.10 | AKR1C4 | 0.287 | 0.021261003 |
| TRUE | High | Master Protein | -5.6E+18 | P07327 | 0 | FALSE | 39 | 13 | 3 | 375 | 39.8 | 7.94 | 189.96 | ENSG00000187758.7 | ADH1A | 0.31 | 4.13484E-05 |
| TRUE | High | Master Protein | -3.3E+18 | P45954 | 0 | FALSE | 4 | 2 | 2 | 432 | 47.5 | 6.99 | 9.72 | ENSG00000196177.12 | ACADSB | 0.333 | 0.001415454 |
| TRUE | High | Master Protein | -6.9E+18 | P31327 | 0 | FALSE | 25 | 32 | 32 | 1500 | 164.8 | 6.74 | 321.12 | ENSG00000021826.14 | CPS1 | 0.344 | 1.74925E-06 |
| TRUE | High | Master Protein | -4.6E+18 | P00403 | 0 | FALSE | 7 | 2 | 2 | 227 | 25.5 | 4.82 | 6.33 | ENSG00000198712.1 | COX2 | 0.357 | 0.01683031 |
| TRUE | High | Master Protein | -5.2E+18 | P00966 | 0 | FALSE | 7 | 4 | 4 | 412 | 46.5 | 8.02 | 16.47 | ENSG00000130707.17 | ASS1 | 0.373 | 0.000980814 |
| TRUE | High | Master Protein | -4.1E+18 | Q99424 | 0 | FALSE | 6 | 3 | 3 | 681 | 76.8 | 7.56 | 12.29 | ENSG00000168306.12 | ACOX2 | 0.374 | 0.030367999 |
| TRUE | High | Master Protein | 3.51E+18 | P00167 | 0 | FALSE | 16 | 2 | 2 | 134 | 15.3 | 4.96 | 39.38 | ENSG00000166347.18 | CYB5A | 0.383 | 0.011562973 |
| TRUE | High | Master Protein | 4.88E+18 | Q6IB77 | 0.002 | FALSE | 3 | 1 | 1 | 296 | 33.9 | 8.16 | 6.02 | ENSG00000149124.10 | GLYAT | 0.401 | 0.028878191 |
| TRUE | High | Master Protein | -2.6E+18 | A0A0A6YYL2 | 0.008 | FALSE | 2 | 1 | 1 | 301 | 34.8 | 5.83 | 2.24 | ENSG00000213648.10; ENSG00000261052.5 | SULT1A4; LOC105369243; SULT1A3 | 0.402 | 0.002212167 |
| TRUE | High | Master Protein | -6.8E+18 | P36269 | 0 | FALSE | 12 | 4 | 4 | 586 | 62.2 | 7.55 | 34.78 | ENSG00000099998.17 | GGT5 | 0.402 | 0.013770323 |
| TRUE | High | Master Protein | -2.7E+18 | Q08AH3 | 0 | FALSE | 21 | 10 | 1 | 577 | 64.2 | 8.09 | 141.3 | ENSG00000183747.11 | ACSM2A | 0.41 | 0.018146388 |
| TRUE | High | Master Protein | -7.8E+18 | P00325 | 0 | FALSE | 45 | 14 | 3 | 375 | 39.8 | 8.29 | 197.47 |  | ADH1B | 0.411 | 1.02172E-05 |
| TRUE | High | Master Protein | 5.32E+18 | A0A0D9SFB5 | 0 | FALSE | 25 | 7 | 6 | 391 | 41.6 | 7.91 | 58.28 | ENSG00000198099.8 |  | 0.422 | 0.001254056 |
| TRUE | High | Master Protein | -1.1E+18 | U3KQ56 | 0 | FALSE | 15 | 4 | 4 | 358 | 38.7 | 8.02 | 67.09 | ENSG00000137106.17 |  | 0.44 | 0.001145013 |
| TRUE | High | Master Protein | 5.84E+18 | P09110 | 0 | FALSE | 22 | 6 | 6 | 424 | 44.3 | 8.44 | 85.9 | ENSG00000060971.17 | ACAA1 | 0.448 | 0.009083964 |
| TRUE | High | Master Protein | 4.17E+18 | Q93088 | 0 | FALSE | 49 | 16 | 12 | 406 | 45 | 7.03 | 268.73 | ENSG00000145692.14 | BHMT | 0.464 | 0.000269758 |
| TRUE | High | Master Protein | -8.9E+18 | P08263 | 0 | FALSE | 18 | 5 | 5 | 222 | 25.6 | 8.88 | 51.58 | ENSG00000243955.5 | GSTA1 | 0.477 | 0.000399014 |
| TRUE | High | Master Protein | 7.75E+18 | P33121 | 0 | FALSE | 9 | 7 | 7 | 698 | 77.9 | 7.15 | 38.24 | ENSG00000151726.13 | ACSL1 | 0.484 | 0.001051362 |
| TRUE | High | Master Protein | -1.5E+17 | P07148 | 0 | FALSE | 80 | 8 | 8 | 127 | 14.2 | 7.18 | 182.89 | ENSG00000163586.9 | FABP1 | 0.489 | 0.03376846 |
| TRUE | High | Master Protein | 1.58E+18 | H3BRN4 | 0 | FALSE | 23 | 10 | 10 | 515 | 58.1 | 8.09 | 104.97 | ENSG00000183044.11 |  | 0.498 | 1.21952E-07 |
| TRUE | High | Master Protein | -4.2E+18 | P16219 | 0 | FALSE | 25 | 6 | 6 | 412 | 44.3 | 7.99 | 103.07 | ENSG00000122971.8 | ACADS | 0.545 | 0.047936469 |
| TRUE | High | Master Protein | 2.94E+18 | P10412 | 0 | FALSE | 28 | 7 | 4 | 219 | 21.9 | 11.03 | 77.92 | ENSG00000168298.6 | HIST1H1E | 0.563 | 0.001340196 |
| TRUE | High | Master Protein | 1.5E+18 | P05089 | 0 | FALSE | 22 | 7 | 7 | 322 | 34.7 | 7.21 | 96.52 | ENSG00000118520.14 | ARG1 | 0.563 | 0.028499206 |
| TRUE | High | Master Protein | 4.82E+18 | P02792 | 0 | FALSE | 9 | 1 | 1 | 175 | 20 | 5.78 | 26.51 | ENSG00000087086.14 | FTL | 0.565 | 0.011146391 |
| TRUE | High | Master Protein | -1.4E+18 | O75452 | 0 | FALSE | 23 | 6 | 6 | 317 | 35.7 | 8.6 | 23.07 | ENSG00000139547.7 | RDH16 | 0.568 | 0.006256796 |
| TRUE | High | Master Protein | -5.2E+18 | P30040 | 0 | FALSE | 10 | 2 | 2 | 261 | 29 | 7.31 | 32.35 | ENSG00000089248.6 | ERP29 | 0.571 | 0.023263092 |
| TRUE | High | Master Protein | -4.5E+17 | P30086 | 0 | FALSE | 41 | 6 | 6 | 187 | 21 | 7.53 | 110.24 | ENSG00000089220.4 | PEBP1 | 0.581 | 0.005412843 |
| TRUE | High | Master Protein | 2.1E+18 | P36871 | 0 | FALSE | 34 | 16 | 16 | 562 | 61.4 | 6.76 | 119.96 | ENSG00000079739.15 | PGM1 | 0.602 | 0.032369466 |
| TRUE | High | Master Protein | -3E+18 | P23141 | 0 | FALSE | 37 | 17 | 17 | 567 | 62.5 | 6.6 | 296.97 | ENSG00000198848.12 | CES1 | 0.611 | 0.012349337 |
| TRUE | High | Master Protein | 2.02E+18 | P24752 | 0 | FALSE | 28 | 11 | 11 | 427 | 45.2 | 8.85 | 63.15 | ENSG00000075239.13 | ACAT1 | 0.612 | 0.000341414 |
| TRUE | High | Master Protein | -3.7E+18 | Q00266 | 0 | FALSE | 14 | 5 | 5 | 395 | 43.6 | 6.29 | 34.56 | ENSG00000151224.12 | MAT1A | 0.613 | 0.036821639 |
| TRUE | High | Master Protein | 7.24E+18 | Q7Z4W1 | 0 | FALSE | 57 | 12 | 12 | 244 | 25.9 | 8.1 | 241.14 | ENSG00000169738.7 | DCXR | 0.615 | 0.017347665 |
| TRUE | High | Master Protein | -2.8E+18 | P68871 | 0 | FALSE | 88 | 11 | 6 | 147 | 16 | 7.28 | 602.36 | ENSG00000244734.3 | HBB | 0.616 | 4.3689E-05 |
| TRUE | High | Master Protein | -4.7E+18 | P02743 | 0 | FALSE | 9 | 2 | 2 | 223 | 25.4 | 6.54 | 12.42 | ENSG00000132703.3 | APCS | 0.617 | 0.041623637 |
| TRUE | High | Master Protein | -5.7E+18 | Q99735 | 0 | FALSE | 10 | 1 | 1 | 147 | 16.6 | 9.55 | 8.3 | ENSG00000085871.8 | MGST2 | 0.623 | 0.020952003 |
| TRUE | High | Master Protein | -5.8E+18 | Q86YB7 | 0 | FALSE | 26 | 6 | 6 | 292 | 31.1 | 8.72 | 52.17 | ENSG00000121310.16 | ECHDC2 | 0.624 | 0.020789685 |
| TRUE | High | Master Protein | 4.81E+18 | P02647 | 0 | FALSE | 58 | 15 | 15 | 267 | 30.8 | 5.76 | 168.54 | ENSG00000118137.9 | APOA1 | 0.627 | 0.019268141 |
| TRUE | High | Master Protein | 5.39E+18 | Q15166 | 0 | FALSE | 5 | 1 | 1 | 354 | 39.6 | 5.41 | 3.71 | ENSG00000105852.10 | PON3 | 0.629 | 0.03370403 |
| TRUE | High | Master Protein | 7.49E+18 | Q68CK6 | 0 | FALSE | 19 | 10 | 1 | 577 | 64.2 | 8.25 | 139.59 | ENSG00000066813.14 | ACSM2B | 0.636 | 0.012187334 |
| TRUE | High | Master Protein | -8.5E+18 | Q14749 | 0 | FALSE | 13 | 3 | 3 | 295 | 32.7 | 7.02 | 26.39 | ENSG00000124713.5 | GNMT | 0.641 | 0.026351208 |
| TRUE | High | Master Protein | -5.6E+18 | Q9H2A2 | 0.002 | FALSE | 2 | 1 | 1 | 487 | 53.4 | 7.14 | 2.47 | ENSG00000118514.13 | ALDH8A1 | 0.648 | 0.038334718 |
| TRUE | High | Master Protein | -1.4E+18 | P61604 | 0 | FALSE | 75 | 8 | 8 | 102 | 10.9 | 8.92 | 66.76 | ENSG00000115541.10 | HSPE1 | 0.655 | 0.004238203 |
| TRUE | High | Master Protein | 1.66E+18 | E9PF18 | 0 | FALSE | 12 | 6 | 6 | 390 | 42.1 | 9.26 | 27.43 | ENSG00000138796.16 |  | 0.674 | 0.006921911 |
| TRUE | High | Master Protein | -3.1E+18 | P26440 | 0 | FALSE | 21 | 9 | 9 | 426 | 46.6 | 8.05 | 31.75 |  |  | 0.689 | 0.023858462 |
| TRUE | High | Master Protein | -8E+18 | P02042 | 0 | FALSE | 77 | 10 | 2 | 147 | 16 | 8.05 | 323.8 | ENSG00000223609.7 | HBD | 0.703 | 0.003900373 |
| TRUE | High | Master Protein | 3.26E+18 | P50440 | 0 | FALSE | 31 | 11 | 11 | 423 | 48.4 | 8.05 | 172.65 | ENSG00000171766.15 | GATM | 0.757 | 0.001241161 |
| TRUE | High | Master Protein | 5.35E+18 | P06737 | 0 | FALSE | 7 | 4 | 4 | 847 | 97.1 | 7.17 | 20.67 | ENSG00000100504.16 | PYGL | 0.793 | 0.041130111 |
| TRUE | High | Master Protein | -7.1E+18 | P80217 | 0.002 | FALSE | 9 | 1 | 1 | 286 | 31.5 | 6.09 | 4.06 | ENSG00000068079.7 | IFI35 | 1.223 | 0.017672953 |
| TRUE | High | Master Protein | 7.21E+18 | P62942 | 0 | FALSE | 13 | 1 | 1 | 108 | 11.9 | 8.16 | 15.37 | ENSG00000088832.16 | FKBP1A | 1.232 | 0.010720219 |
| TRUE | Medium | Master Protein | -2.8E+18 | Q96FQ6 | 0.01 | FALSE | 12 | 1 | 1 | 103 | 11.8 | 6.79 | 3.05 | ENSG00000188643.10 | S100A16 | 1.251 | 0.019787512 |
| TRUE | High | Master Protein | -5.7E+18 | Q5TA02 | 0 | FALSE | 35 | 8 | 1 | 200 | 23.3 | 7.21 | 41.99 | ENSG00000148834.12 | GSTO1 | 1.253 | 0.013045587 |
| TRUE | High | Master Protein | 3.07E+18 | Q07954 | 0 | FALSE | 1 | 5 | 5 | 4544 | 504.3 | 5.39 | 26.19 | ENSG00000123384.13 | LRP1 | 1.253 | 0.03429139 |
| TRUE | High | Master Protein | 5.21E+18 | K7EM18 | 0 | FALSE | 13 | 1 | 1 | 121 | 13.6 | 7.9 | 15.26 | ENSG00000173812.10 |  | 1.261 | 0.009442114 |
| TRUE | High | Master Protein | 8.58E+18 | P02748 | 0.002 | FALSE | 2 | 1 | 1 | 559 | 63.1 | 5.59 | 2.05 | ENSG00000113600.10 | C9 | 1.28 | 0.047108632 |
| TRUE | High | Master Protein | -6.2E+18 | Q5T013 | 0 | FALSE | 10 | 3 | 2 | 277 | 30.4 | 5.5 | 9.61 | ENSG00000178922.16 | HYI | 1.303 | 0.030815846 |
| TRUE | High | Master Protein | 7.33E+18 | O95777 | 0 | FALSE | 17 | 1 | 1 | 96 | 10.4 | 4.48 | 11.79 | ENSG00000128534.7 | NAA38; LSM8 | 1.303 | 0.040509049 |
| TRUE | High | Master Protein | 8.79E+18 | A0A0C4DG17 | 0 | FALSE | 14 | 3 | 3 | 300 | 33.3 | 4.87 | 19.64 | ENSG00000168028.13 | RPSA | 1.337 | 0.036147053 |
| TRUE | High | Master Protein | 7.72E+18 | P61970 | 0 | FALSE | 11 | 1 | 1 | 127 | 14.5 | 5.38 | 4.69 | ENSG00000102898.11 | NUTF2 | 1.357 | 0.003855422 |
| TRUE | High | Master Protein | -7.2E+18 | Q9Y224 | 0.002 | FALSE | 3 | 1 | 1 | 244 | 28.1 | 6.65 | 6.72 | ENSG00000087302.8 | C14orf166; RTRAF | 1.358 | 0.011159003 |
| TRUE | High | Master Protein | 3.45E+18 | O43707 | 0 | FALSE | 25 | 20 | 12 | 911 | 104.8 | 5.44 | 271.28 | ENSG00000282844.1; ENSG00000130402.11 | ACTN4 | 1.375 | 0.032245112 |
| TRUE | High | Master Protein | -7.1E+18 | P09012 | 0.002 | FALSE | 4 | 1 | 1 | 282 | 31.3 | 9.83 | 6.59 | ENSG00000077312.8 | SNRPA | 1.378 | 0.007511679 |
| TRUE | High | Master Protein | -3.9E+18 | P16401 | 0 | FALSE | 20 | 5 | 2 | 226 | 22.6 | 10.92 | 56.73 | ENSG00000184357.4 | HIST1H1B | 1.384 | 0.027838565 |
| TRUE | High | Master Protein | -5.4E+18 | A0A0G2JIW1 | 0 | FALSE | 31 | 16 | 12 | 642 | 70.1 | 5.66 | 131.53 | ENSG00000232804.5; ENSG00000212866.6; ENSG00000224501.5 |  | 1.384 | 0.035123294 |
| TRUE | High | Master Protein | -2.3E+18 | A2A274 | 0 | FALSE | 13 | 8 | 8 | 805 | 87.8 | 7.37 | 64.53 | ENSG00000100412.15 | ACO2 | 1.424 | 0.027676284 |
| TRUE | High | Master Protein | 4.78E+18 | Q96CN7 | 0 | FALSE | 6 | 2 | 2 | 298 | 32.2 | 7.39 | 13.15 | ENSG00000066583.11 | ISOC1 | 1.438 | 0.026688079 |
| TRUE | High | Master Protein | -1E+18 | O94760 | 0 | FALSE | 10 | 2 | 2 | 285 | 31.1 | 5.81 | 23.09 | ENSG00000153904.18 | DDAH1 | 1.466 | 0.048726219 |
| TRUE | High | Master Protein | -2E+17 | P25788 | 0 | FALSE | 5 | 1 | 1 | 255 | 28.4 | 5.33 | 9.61 | ENSG00000100567.12 | PSMA3 | 1.474 | 4.41165E-06 |
| TRUE | High | Master Protein | -3.5E+18 | P09525 | 0 | FALSE | 37 | 10 | 10 | 319 | 35.9 | 6.13 | 192.23 |  | ANXA4 | 1.475 | 0.003245722 |
| TRUE | High | Master Protein | 7.69E+18 | O14818 | 0 | FALSE | 9 | 2 | 2 | 248 | 27.9 | 8.46 | 17.25 | ENSG00000101182.14 | PSMA7 | 1.478 | 4.60647E-05 |
| TRUE | High | Master Protein | -5E+18 | E7EX17 | 0 | FALSE | 6 | 3 | 3 | 616 | 69.7 | 5.67 | 12.23 | ENSG00000063046.17 | EIF4B | 1.493 | 0.008455327 |
| TRUE | High | Master Protein | -6.3E+18 | P06132 | 0 | FALSE | 11 | 3 | 3 | 367 | 40.8 | 6.14 | 19.98 | ENSG00000126088.13 | UROD | 1.495 | 0.022619819 |
| TRUE | High | Master Protein | -9.1E+18 | P05164 | 0 | FALSE | 12 | 8 | 8 | 745 | 83.8 | 8.97 | 37.73 | ENSG00000005381.7 | MPO | 1.496 | 0.045961469 |
| TRUE | High | Master Protein | -5.9E+18 | P25787 | 0.005 | FALSE | 3 | 1 | 1 | 234 | 25.9 | 7.43 | 5.41 | ENSG00000256646.7; ENSG00000106588.10 | PSMA2 | 1.522 | 0.013997646 |
| TRUE | High | Master Protein | 3.91E+18 | E5RFR7 | 0.005 | FALSE | 6 | 1 | 1 | 111 | 12.4 | 4.68 | 2.27 | ENSG00000076554.15 |  | 1.528 | 0.012592231 |
| TRUE | High | Master Protein | -8.6E+18 | Q12906 | 0 | FALSE | 4 | 3 | 3 | 894 | 95.3 | 8.76 | 19.22 | ENSG00000129351.17 | ILF3 | 1.536 | 0.03632185 |
| TRUE | High | Master Protein | -1.2E+18 | P26038 | 0 | FALSE | 18 | 11 | 7 | 577 | 67.8 | 6.4 | 94.35 | ENSG00000147065.16 | MSN | 1.552 | 0.005320003 |
| TRUE | High | Master Protein | 4.26E+18 | A8MWD9 | 0 | FALSE | 25 | 2 | 2 | 76 | 8.5 | 8.84 | 4.61 |  | LOC100130932; SNRPGP15 | 1.579 | 0.021855195 |
| TRUE | High | Master Protein | -6E+18 | Q9BRJ6 | 0 | FALSE | 11 | 1 | 1 | 194 | 22.1 | 9.64 | 6.61 | ENSG00000146540.14 | C7orf50 | 1.579 | 0.029054988 |
| TRUE | High | Master Protein | 2.43E+18 | P22314 | 0 | FALSE | 12 | 9 | 9 | 1058 | 117.8 | 5.76 | 97.89 | ENSG00000130985.16 | UBA1 | 1.582 | 0.049851379 |
| TRUE | High | Master Protein | -6.4E+18 | O00468 | 0 | FALSE | 1 | 2 | 2 | 2068 | 217.2 | 6.39 | 6.77 |  |  | 1.6 | 0.015342977 |
| TRUE | High | Master Protein | 6.24E+17 | P61981 | 0 | FALSE | 20 | 5 | 3 | 247 | 28.3 | 4.89 | 33.59 | ENSG00000170027.6 | YWHAG | 1.605 | 5.03783E-05 |
| TRUE | High | Master Protein | 4.64E+18 | P24666 | 0 | FALSE | 13 | 2 | 2 | 158 | 18 | 6.74 | 7.67 | ENSG00000143727.15 | ACP1 | 1.606 | 0.01959152 |
| TRUE | Medium | Master Protein | -5.5E+18 | P25786 | 0.014 | FALSE | 3 | 1 | 1 | 263 | 29.5 | 6.61 | 4.78 | ENSG00000129084.17 | PSMA1 | 1.611 | 0.045215237 |
| TRUE | High | Master Protein | 1.35E+18 | B5MBZ0 | 0 | FALSE | 4 | 2 | 2 | 992 | 110.1 | 6.49 | 22.88 | ENSG00000143924.18 | EML4 | 1.613 | 0.00761817 |
| TRUE | High | Master Protein | -7E+17 | Q9BQ61 | 0 | FALSE | 8 | 1 | 1 | 176 | 18.4 | 9.44 | 7.05 | ENSG00000123144.10 | C19orf43; TRIR | 1.657 | 0.010612878 |
| TRUE | High | Master Protein | 1.71E+18 | O00499 | 0 | FALSE | 2 | 1 | 1 | 593 | 64.7 | 5.06 | 3.81 | ENSG00000136717.14 | BIN1 | 1.679 | 0.045549774 |
| TRUE | High | Master Protein | 8.88E+18 | A0A087WTP3 | 0 | FALSE | 6 | 2 | 2 | 711 | 73 | 7.71 | 14.79 | ENSG00000088247.17 |  | 1.688 | 0.003983824 |
| TRUE | High | Master Protein | 3.95E+18 | Q9UQ80 | 0 | FALSE | 4 | 2 | 2 | 394 | 43.8 | 6.55 | 4.88 | ENSG00000170515.13 | PA2G4 | 1.689 | 0.035041877 |
| TRUE | High | Master Protein | 5.56E+18 | P38646 | 0 | FALSE | 24 | 14 | 13 | 679 | 73.6 | 6.16 | 145.95 | ENSG00000113013.12 | HSPA9 | 1.694 | 0.04868382 |
| TRUE | High | Master Protein | 2.02E+18 | P53396 | 0 | FALSE | 1 | 1 | 1 | 1101 | 120.8 | 7.33 | 8.02 | ENSG00000131473.16 | ACLY | 1.702 | 0.021660862 |
| TRUE | High | Master Protein | -1.8E+18 | O95865 | 0 | FALSE | 9 | 3 | 3 | 285 | 29.6 | 6.01 | 9.58 | ENSG00000233076.6; ENSG00000227317.6; ENSG00000213722.8; ENSG00000228128.6; ENSG00000225635.7; ENSG00000206395.8; ENSG00000226634.6 | DDAH2 | 1.71 | 0.049329168 |
| TRUE | High | Master Protein | 3.93E+18 | P31948 | 0 | FALSE | 6 | 3 | 3 | 543 | 62.6 | 6.8 | 23.99 | ENSG00000168439.16 | STIP1 | 1.739 | 0.002859355 |
| TRUE | High | Master Protein | 4.31E+18 | Q9H4A3 | 0 | FALSE | 1 | 1 | 1 | 2382 | 250.6 | 6.34 | 8.56 | ENSG00000060237.16 | WNK1 | 1.74 | 0.018636084 |
| TRUE | High | Master Protein | 1.42E+18 | E9PRY8 | 0 | FALSE | 9 | 4 | 4 | 697 | 76.5 | 7.05 | 68.32 | ENSG00000104529.17 |  | 1.742 | 0.001273546 |
| TRUE | High | Master Protein | -5.4E+18 | O75390 | 0 | FALSE | 9 | 4 | 3 | 466 | 51.7 | 8.32 | 41.55 | ENSG00000062485.18 | CS | 1.77 | 0.044614318 |
| TRUE | High | Master Protein | 4.92E+17 | P02545 | 0 | FALSE | 18 | 12 | 12 | 664 | 74.1 | 7.02 | 74.3 | ENSG00000160789.19 | LMNA | 1.775 | 0.021143597 |
| TRUE | High | Master Protein | -3.5E+18 | Q04917 | 0 | FALSE | 17 | 4 | 2 | 246 | 28.2 | 4.84 | 31.89 | ENSG00000128245.14 | YWHAH | 1.784 | 0.000464515 |
| TRUE | High | Master Protein | 9.19E+18 | P30613 | 0 | FALSE | 29 | 15 | 13 | 574 | 61.8 | 7.74 | 139.02 | ENSG00000143627.17; ENSG00000262785.5 | PKLR | 1.796 | 0.006202781 |
| TRUE | High | Master Protein | 2.14E+17 | Q92896 | 0 | FALSE | 1 | 1 | 1 | 1179 | 134.5 | 6.9 | 9.46 | ENSG00000090863.11 | GLG1 | 1.805 | 0.035393344 |
| TRUE | High | Master Protein | -8.7E+18 | P27695 | 0 | FALSE | 3 | 1 | 1 | 318 | 35.5 | 8.12 | 3.58 | ENSG00000100823.11 | APEX1 | 1.821 | 0.01746142 |
| TRUE | High | Master Protein | 8.83E+18 | Q15056 | 0.002 | FALSE | 5 | 2 | 2 | 248 | 27.4 | 7.23 | 8.14 | ENSG00000106682.14 | EIF4H | 1.827 | 0.016268395 |
| TRUE | High | Master Protein | -6.2E+18 | A0A0A0MSS8 | 0 | FALSE | 17 | 7 | 1 | 323 | 36.8 | 7.94 | 38.39 | ENSG00000196139.13 | AKR1C3 | 1.835 | 0.001941513 |
| TRUE | High | Master Protein | -4.6E+18 | P38159 | 0 | FALSE | 6 | 3 | 3 | 391 | 42.3 | 10.05 | 21.36 | ENSG00000147274.14 | RBMX | 1.868 | 0.000179458 |
| TRUE | High | Master Protein | -3.4E+18 | O14745 | 0 | FALSE | 6 | 2 | 2 | 358 | 38.8 | 5.77 | 14.9 | ENSG00000109062.11 | SLC9A3R1 | 1.878 | 0.027980277 |
| TRUE | High | Master Protein | 1.07E+18 | P22626 | 0 | FALSE | 17 | 5 | 5 | 353 | 37.4 | 8.95 | 38.95 | ENSG00000122566.20 | HNRNPA2B1 | 1.883 | 0.008451533 |
| TRUE | High | Master Protein | -3.3E+18 | O75533 | 0 | FALSE | 1 | 1 | 1 | 1304 | 145.7 | 7.09 | 34.1 | ENSG00000115524.15 | SF3B1 | 1.888 | 0.035351106 |
| TRUE | High | Master Protein | 3.6E+18 | P19338 | 0 | FALSE | 9 | 7 | 7 | 710 | 76.6 | 4.7 | 21.06 | ENSG00000115053.15 | NCL | 1.907 | 0.000312407 |
| TRUE | High | Master Protein | 6.23E+18 | Q08170 | 0 | FALSE | 3 | 2 | 2 | 494 | 56.6 | 11.52 | 9.03 | ENSG00000116350.16 | SRSF4 | 1.912 | 0.00920545 |
| TRUE | High | Master Protein | -9.1E+18 | P63104 | 0 | FALSE | 25 | 6 | 4 | 245 | 27.7 | 4.79 | 62.16 | ENSG00000164924.17 | YWHAZ | 1.918 | 0.004465656 |
| TRUE | High | Master Protein | -6.9E+18 | A0A2R8Y5P7 | 0.002 | FALSE | 2 | 1 | 1 | 512 | 57.5 | 8.02 | 3.4 |  |  | 1.992 | 0.016593005 |
| TRUE | High | Master Protein | 4.87E+18 | P31146 | 0 | FALSE | 7 | 3 | 3 | 461 | 51 | 6.68 | 13.7 | ENSG00000102879.15 | CORO1A | 2.034 | 0.01643817 |
| TRUE | High | Master Protein | 6.51E+18 | Q9NYL4 | 0.002 | FALSE | 3 | 1 | 1 | 201 | 22.2 | 9.39 | 0 | ENSG00000134285.10 | FKBP11 | 2.048 | 0.010507124 |
| TRUE | High | Master Protein | -2.4E+18 | Q01995 | 0 | FALSE | 12 | 3 | 3 | 201 | 22.6 | 8.84 | 5.51 | ENSG00000149591.16 | TAGLN | 2.063 | 0.028410353 |
| TRUE | High | Master Protein | 6.18E+18 | Q5JRX3 | 0 | FALSE | 1 | 2 | 2 | 1037 | 117.3 | 6.92 | 5.38 | ENSG00000107959.15 | PITRM1 | 2.081 | 0.024911616 |
| TRUE | Medium | Master Protein | -2.3E+18 | Q8NE18 | 0.013 | FALSE | 1 | 1 | 1 | 718 | 81 | 8.75 | 2.3 | ENSG00000179299.16 | NSUN7 | 2.125 | 0.006551213 |
| TRUE | High | Master Protein | 6.3E+18 | H0YL33 | 0 | FALSE | 70 | 10 | 1 | 142 | 16.4 | 5.17 | 255.84 | ENSG00000182718.16 |  | 2.138 | 0.000574703 |
| TRUE | High | Master Protein | -4.6E+18 | P39060 | 0 | FALSE | 3 | 5 | 5 | 1754 | 178.1 | 6.01 | 30.55 | ENSG00000182871.14 | COL18A1 | 2.141 | 0.000165584 |
| TRUE | High | Master Protein | 5.11E+18 | P08246 | 0.004 | FALSE | 3 | 1 | 1 | 267 | 28.5 | 9.35 | 5.16 | ENSG00000277571.2; ENSG00000197561.6 | ELANE | 2.145 | 0.012245961 |
| TRUE | High | Master Protein | 3.82E+18 | P13639 | 0 | FALSE | 12 | 10 | 10 | 858 | 95.3 | 6.83 | 56.89 | ENSG00000167658.15 | EEF2 | 2.15 | 0.006090463 |
| TRUE | High | Master Protein | -5.2E+18 | Q8NFW8 | 0 | FALSE | 2 | 1 | 1 | 434 | 48.3 | 7.93 | 5.93 | ENSG00000111726.12 | CMAS | 2.19 | 0.019848128 |
| TRUE | High | Master Protein | 2.45E+18 | P27487 | 0 | FALSE | 3 | 3 | 3 | 766 | 88.2 | 6.04 | 9.39 | ENSG00000197635.9 | DPP4 | 2.193 | 0.000906808 |
| TRUE | High | Master Protein | 5.73E+18 | O43396 | 0 | FALSE | 7 | 1 | 1 | 289 | 32.2 | 4.96 | 14.26 | ENSG00000091164.12 | TXNL1 | 2.197 | 0.004597467 |
| TRUE | High | Master Protein | 7.06E+18 | P08758 | 0 | FALSE | 32 | 8 | 8 | 320 | 35.9 | 5.05 | 178.92 | ENSG00000164111.14 | ANXA5 | 2.207 | 0.000292645 |
| TRUE | High | Master Protein | -2.1E+18 | Q9UMS4 | 0.004 | FALSE | 2 | 1 | 1 | 504 | 55.1 | 6.61 | 2.36 | ENSG00000110107.8 | PRPF19 | 2.251 | 0.017131692 |
| TRUE | High | Master Protein | 6.73E+18 | Q13838 | 0 | FALSE | 5 | 3 | 3 | 428 | 49 | 5.67 | 8.59 | ENSG00000225859.10; ENSG00000215425.11; ENSG00000198563.13; ENSG00000235439.10; ENSG00000230624.10; ENSG00000225073.10; ENSG00000229496.10 | DDX39B | 2.264 | 5.57439E-05 |
| TRUE | High | Master Protein | -5.5E+18 | P61086 | 0 | FALSE | 8 | 1 | 1 | 200 | 22.4 | 5.44 | 8.66 | ENSG00000078140.13 | UBE2K | 2.269 | 0.042963435 |
| TRUE | High | Master Protein | -8.1E+18 | P43121 | 0 | FALSE | 4 | 2 | 2 | 646 | 71.6 | 5.76 | 8.95 | ENSG00000076706.16 | MCAM | 2.272 | 0.003313219 |
| TRUE | High | Master Protein | -2E+18 | P12955 | 0 | FALSE | 4 | 2 | 2 | 493 | 54.5 | 6 | 7.25 | ENSG00000124299.13 | PEPD | 2.303 | 0.030402148 |
| TRUE | High | Master Protein | 5.88E+18 | P02649 | 0 | FALSE | 57 | 16 | 16 | 317 | 36.1 | 5.73 | 147.22 | ENSG00000130203.9 | APOE | 2.35 | 0.000203858 |
| TRUE | High | Master Protein | -8.4E+18 | P08621 | 0 | FALSE | 6 | 3 | 3 | 437 | 51.5 | 9.94 | 8.58 | ENSG00000104852.14 | SNRNP70 | 2.351 | 0.011593589 |
| TRUE | High | Master Protein | -4.8E+17 | Q15102 | 0 | FALSE | 4 | 1 | 1 | 231 | 25.7 | 6.84 | 6.81 | ENSG00000079462.7 | PAFAH1B3 | 2.355 | 0.002545573 |
| TRUE | High | Master Protein | 6.49E+18 | P14618 | 0 | FALSE | 16 | 10 | 8 | 531 | 57.9 | 7.84 | 53.42 | ENSG00000067225.17 | PKM | 2.387 | 5.71224E-05 |
| TRUE | High | Master Protein | 4.54E+18 | P02751 | 0 | FALSE | 9 | 17 | 17 | 2386 | 262.5 | 5.71 | 101.43 | ENSG00000115414.18 | FN1 | 2.421 | 0.024101875 |
| TRUE | High | Master Protein | -4.9E+18 | P50995 | 0 | FALSE | 9 | 4 | 4 | 505 | 54.4 | 7.65 | 21.36 | ENSG00000122359.17 | ANXA11 | 2.478 | 0.009933898 |
| TRUE | High | Master Protein | 2.66E+17 | X6R8A1 | 0 | FALSE | 3 | 1 | 1 | 498 | 56.2 | 6.61 | 8.85 | ENSG00000064601.16 | CTSA | 2.49 | 0.005704058 |
| TRUE | High | Master Protein | -2.3E+18 | J3KPS3 | 0 | FALSE | 28 | 10 | 9 | 368 | 39.8 | 8.09 | 80.17 | ENSG00000149925.17 | ALDOA | 2.508 | 0.027673915 |
| TRUE | High | Master Protein | -4.5E+18 | Q9Y5S9 | 0.002 | FALSE | 5 | 1 | 1 | 174 | 19.9 | 5.72 | 7.14 | ENSG00000265241.6 | RBM8A; LOC101060541 | 2.606 | 0.003011505 |
| TRUE | High | Master Protein | -5.1E+18 | P09972 | 0 | FALSE | 27 | 9 | 7 | 364 | 39.4 | 6.87 | 134.94 | ENSG00000109107.13 | ALDOC | 2.737 | 0.004084709 |
| TRUE | High | Master Protein | 8.85E+18 | Q9HCD5 | 0.002 | FALSE | 2 | 1 | 1 | 579 | 65.5 | 9.6 | 3.37 | ENSG00000124160.11 | NCOA5 | 2.783 | 0.036079818 |
| TRUE | High | Master Protein | 3.62E+17 | P07355 | 0 | FALSE | 50 | 17 | 8 | 339 | 38.6 | 7.75 | 363.46 | ENSG00000182718.16 | ANXA2 | 2.893 | 2.3658E-06 |
| TRUE | High | Master Protein | 6.53E+18 | Q09028 | 0 | FALSE | 2 | 1 | 1 | 425 | 47.6 | 4.89 | 7.31 | ENSG00000162521.18 | RBBP4 | 3.096 | 0.028617172 |
| TRUE | High | Master Protein | 6.12E+18 | P78330 | 0 | FALSE | 10 | 2 | 2 | 225 | 25 | 5.69 | 8 | ENSG00000146733.13 | PSPH | 3.37 | 0.024615492 |
| TRUE | High | Master Protein | -7.6E+18 | P07996 | 0 | FALSE | 2 | 2 | 2 | 1170 | 129.3 | 4.94 | 6.97 | ENSG00000137801.10 | THBS1 | 3.378 | 0.013398447 |
| TRUE | High | Master Protein | -4.1E+18 | P05109 | 0 | FALSE | 28 | 3 | 3 | 93 | 10.8 | 7.03 | 49.53 | ENSG00000143546.9 | S100A8 | 3.411 | 5.07567E-05 |
| TRUE | High | Master Protein | 5.7E+18 | B1AHL2 | 0 | FALSE | 2 | 1 | 1 | 721 | 78.3 | 5.39 | 3.8 | ENSG00000077942.18 | FBLN1 | 4.212 | 0.044324917 |
| TRUE | High | Master Protein | -4.9E+18 | O60218 | 0 | FALSE | 7 | 2 | 2 | 316 | 36 | 7.84 | 25.59 | ENSG00000198074.9 | AKR1B10 | 4.316 | 0.001528148 |
| TRUE | High | Master Protein | 9.89E+17 | P01833 | 0.002 | FALSE | 1 | 1 | 1 | 764 | 83.2 | 5.74 | 3.31 | ENSG00000162896.5 | PIGR | 4.906 | 0.008482224 |

Supplementary Table S3: List of differentially expressed proteins between G1 HCC tumor and G1 adjacent non-tomor.

| **Checked** | **Protein FDR Confidence** | **Master** | **Unique Sequence ID** | **Accession** | **Exp. q-value** | **Contaminant** | **Coverage [%]** | **# Peptides** | **# Unique Peptides** | **# AAs** | **MW [kDa]** | **calc. pI** | **Score Sequest HT:** | **Ensembl Gene ID** | **Gene Symbol** | **G1/G1 non-tumor Abundance Ratio** | **G1/G1 non-tumor Abundance Ratio P-Value** |
| --- | --- | --- | --- | --- | --- | --- | --- | --- | --- | --- | --- | --- | --- | --- | --- | --- | --- |
| TRUE | High | Master Protein | -6.9E+18 | P31327 | 0 | FALSE | 25 | 32 | 32 | 1500 | 164.8 | 6.74 | 321.12 | ENSG00000021826.14 | CPS1 | 0.169 | 4.78494E-10 |
| TRUE | High | Master Protein | -2.8E+18 | P68871 | 0 | FALSE | 88 | 11 | 6 | 147 | 16 | 7.28 | 602.36 | ENSG00000244734.3 | HBB | 0.368 | 0.001031335 |
| TRUE | High | Master Protein | -5.2E+18 | P00966 | 0 | FALSE | 7 | 4 | 4 | 412 | 46.5 | 8.02 | 16.47 | ENSG00000130707.17 | ASS1 | 0.188 | 3.02217E-05 |
| TRUE | High | Master Protein | 2.94E+18 | P10412 | 0 | FALSE | 28 | 7 | 4 | 219 | 21.9 | 11.03 | 77.92 | ENSG00000168298.6 | HIST1H1E | 0.274 | 2.30305E-05 |
| TRUE | High | Master Protein | 6.51E+18 | Q9NYL4 | 0.002 | FALSE | 3 | 1 | 1 | 201 | 22.2 | 9.39 | 0 | ENSG00000134285.10 | FKBP11 | 5.902 | 5.06554E-05 |
| TRUE | High | Master Protein | -3.2E+18 | P02452 | 0.002 | FALSE | 1 | 1 | 1 | 1464 | 138.9 | 5.8 | 5.66 | ENSG00000108821 | COL1A1 | 0.203 | 0.007286795 |
| TRUE | High | Master Protein | 6.73E+18 | Q13838 | 0 | FALSE | 5 | 3 | 3 | 428 | 49 | 5.67 | 8.59 | ENSG00000225859.10; ENSG00000215425.11; ENSG00000198563.13; ENSG00000235439.10; ENSG00000230624.10; ENSG00000225073.10; ENSG00000229496.10 | DDX39B | 2.59 | 0.000241048 |
| TRUE | High | Master Protein | 4.64E+18 | P24666 | 0 | FALSE | 13 | 2 | 2 | 158 | 18 | 6.74 | 7.67 | ENSG00000143727.15 | ACP1 | 2.917 | 0.006294553 |
| TRUE | High | Master Protein | 5.32E+18 | A0A0D9SFB5 | 0 | FALSE | 25 | 7 | 6 | 391 | 41.6 | 7.91 | 58.28 | ENSG00000198099.8 | ADH4 | 0.072 | 0.000638401 |
| TRUE | High | Master Protein | 8.47E+18 | Q12907 | 0 | FALSE | 6 | 2 | 2 | 356 | 40.2 | 6.95 | 12.56 | ENSG00000169223.14 | LMAN2 | 1.765 | 0.038772431 |
| TRUE | High | Master Protein | -8.7E+18 | P26373 | 0.002 | FALSE | 4 | 1 | 1 | 211 | 24.2 | 11.65 | 4.61 | ENSG00000167526.13 | RPL13 | 0.182 | 0.023743586 |
| TRUE | High | Master Protein | -5.4E+18 | A0A0B4J1V0 | 0.005 | FALSE | 6 | 1 | 1 | 119 | 12.9 | 8.62 | 5.15 | ENSG00000211943.2; ENSG00000282290.1 | IGHV3-15 | 1.992 | 0.010009993 |
| TRUE | High | Master Protein | -9.1E+18 | Q16777 | 0 | FALSE | 37 | 5 | 1 | 129 | 14 | 10.9 | 128.69 | ENSG00000184260.5 | HIST2H2AC | 0.326 | 0.03694375 |
| TRUE | High | Master Protein | 2.14E+17 | Q92896 | 0 | FALSE | 1 | 1 | 1 | 1179 | 134.5 | 6.9 | 9.46 | ENSG00000090863.11 | GLG1 | 1.94 | 0.013953184 |
| TRUE | High | Master Protein | -7.8E+18 | P00325 | 0 | FALSE | 45 | 14 | 3 | 375 | 39.8 | 8.29 | 197.47 | ENSG00000196616 | ADH1B | 0.165 | 0.001065607 |
| TRUE | High | Master Protein | 7.21E+18 | P62942 | 0 | FALSE | 13 | 1 | 1 | 108 | 11.9 | 8.16 | 15.37 | ENSG00000088832.16 | FKBP1A | 1.201 | 0.02325838 |
| TRUE | High | Master Protein | -3.3E+18 | P45954 | 0 | FALSE | 4 | 2 | 2 | 432 | 47.5 | 6.99 | 9.72 | ENSG00000196177.12 | ACADSB | 0.292 | 0.029928488 |
| TRUE | High | Master Protein | -6.2E+18 | A0A0A0MSS8 | 0 | FALSE | 17 | 7 | 1 | 323 | 36.8 | 7.94 | 38.39 | ENSG00000196139.13 | AKR1C3 | 2.384 | 0.023924581 |
| TRUE | High | Master Protein | -4.8E+17 | Q15102 | 0 | FALSE | 4 | 1 | 1 | 231 | 25.7 | 6.84 | 6.81 | ENSG00000079462.7 | PAFAH1B3 | 2.724 | 0.022906165 |
| TRUE | High | Master Protein | 4.87E+18 | P31146 | 0 | FALSE | 7 | 3 | 3 | 461 | 51 | 6.68 | 13.7 | ENSG00000102879.15 | CORO1A | 3.178 | 0.008091278 |
| TRUE | High | Master Protein | -7.1E+18 | P09012 | 0.002 | FALSE | 4 | 1 | 1 | 282 | 31.3 | 9.83 | 6.59 | ENSG00000077312.8 | SNRPA | 1.682 | 0.022304125 |
| TRUE | High | Master Protein | -2E+17 | P25788 | 0 | FALSE | 5 | 1 | 1 | 255 | 28.4 | 5.33 | 9.61 | ENSG00000100567.12 | PSMA3 | 1.713 | 0.000871216 |
| TRUE | High | Master Protein | 5.73E+18 | O43396 | 0 | FALSE | 7 | 1 | 1 | 289 | 32.2 | 4.96 | 14.26 | ENSG00000091164.12 | TXNL1 | 3.706 | 0.012321826 |
| TRUE | High | Master Protein | 7.06E+18 | P08758 | 0 | FALSE | 32 | 8 | 8 | 320 | 35.9 | 5.05 | 178.92 | ENSG00000164111.14 | ANXA5 | 3.484 | 0.021411605 |
| TRUE | High | Master Protein | 6.24E+17 | P61981 | 0 | FALSE | 20 | 5 | 3 | 247 | 28.3 | 4.89 | 33.59 | ENSG00000170027.6 | YWHAG | 2.096 | 0.006382325 |
| TRUE | High | Master Protein | -1E+18 | O94760 | 0 | FALSE | 10 | 2 | 2 | 285 | 31.1 | 5.81 | 23.09 | ENSG00000153904.18 | DDAH1 | 2.029 | 0.009313247 |
| TRUE | High | Master Protein | -3.5E+18 | Q04917 | 0 | FALSE | 17 | 4 | 2 | 246 | 28.2 | 4.84 | 31.89 | ENSG00000128245.14 | YWHAH | 2.11 | 0.039082365 |
| TRUE | High | Master Protein | 3.62E+17 | P07355 | 0 | FALSE | 50 | 17 | 8 | 339 | 38.6 | 7.75 | 363.46 | ENSG00000182718.16 | ANXA2 | 2.38 | 0.043183887 |
| TRUE | High | Master Protein | -1.4E+18 | P61604 | 0 | FALSE | 75 | 8 | 8 | 102 | 10.9 | 8.92 | 66.76 | ENSG00000115541.10 | HSPE1 | 0.553 | 0.036184728 |
| TRUE | High | Master Protein | 1.58E+18 | H3BRN4 | 0 | FALSE | 23 | 10 | 10 | 515 | 58.1 | 8.09 | 104.97 | ENSG00000183044.11 | ABAT | 0.534 | 0.04111416 |

Supplementary Table S4: List of differentially expressed proteins between G2 HCC tumor and G2 adjacent non-tomor.

| **Checked** | **Protein FDR Confidence** | **Master** | **Unique Sequence ID** | **Accession** | **Exp. q-value** | **Contaminant** | **Coverage [%]** | **# Peptides** | **# Unique Peptides** | **# AAs** | **MW [kDa]** | **calc. pI** | **Score Sequest HT** | **Ensembl Gene ID** | **Gene Symbol** | **G2/G2 non-tumor Abundance Ratio** | **G2/G2 non-tumor Abundance Ratio P-Value** |
| --- | --- | --- | --- | --- | --- | --- | --- | --- | --- | --- | --- | --- | --- | --- | --- | --- | --- |
| TRUE | High | Master Protein | -5.2338E+18 | P00966 | 0 | FALSE | 7 | 4 | 4 | 412 | 46.5 | 8.02 | 16.47 | ENSG00000130707.17 | ASS1 | 0.436 | 0.035956905 |
| TRUE | High | Master Protein | -6.2651E+18 | P06132 | 0 | FALSE | 11 | 3 | 3 | 367 | 40.8 | 6.14 | 19.98 | ENSG00000126088.13 | UROD | 2.229 | 0.000556399 |
| TRUE | High | Master Protein | -3.6701E+18 | H0Y449 | 0 | FALSE | 5 | 1 | 1 | 374 | 42 | 10.43 | 10.88 | ENSG00000065978.18 | YBX1 | 0.69 | 0.034356643 |
| TRUE | High | Master Protein | 3.50865E+18 | P00167 | 0 | FALSE | 16 | 2 | 2 | 134 | 15.3 | 4.96 | 39.38 | ENSG00000166347.18 | CYB5A | 0.308 | 0.012929922 |
| TRUE | High | Master Protein | -6.0858E+18 | P01706 | 0.005 | FALSE | 7 | 1 | 1 | 119 | 12.6 | 7.24 | 6.8 | ENSG00000211668.2 | IGLV2-11 | 1.987 | 7.82283E-05 |
| TRUE | High | Master Protein | -5.0977E+18 | Q02252 | 0 | FALSE | 29 | 14 | 14 | 535 | 57.8 | 8.5 | 105.26 | ENSG00000119711.12 | ALDH6A1 | 0.457 | 0.015847195 |
| TRUE | High | Master Protein | 6.73347E+18 | Q13838 | 0 | FALSE | 5 | 3 | 3 | 428 | 49 | 5.67 | 8.59 | ENSG00000225859.10; ENSG00000215425.11; ENSG00000198563.13; ENSG00000235439.10; ENSG00000230624.10; ENSG00000225073.10; ENSG00000229496.10 | DDX39B | 2.379 | 0.000592439 |
| TRUE | High | Master Protein | -5.3749E+18 | A0A0B4J1V0 | 0.005 | FALSE | 6 | 1 | 1 | 119 | 12.9 | 8.62 | 5.15 | ENSG00000211943.2; ENSG00000282290.1 | IGHV3-15 | 2.992 | 0.000855426 |
| TRUE | High | Master Protein | 2.13953E+17 | Q92896 | 0 | FALSE | 1 | 1 | 1 | 1179 | 134.5 | 6.9 | 9.46 | ENSG00000090863.11 | GLG1 | 1.805 | 0.024124369 |
| TRUE | High | Master Protein | 7.2145E+18 | P62942 | 0 | FALSE | 13 | 1 | 1 | 108 | 11.9 | 8.16 | 15.37 | ENSG00000088832.16 | FKBP1A | 1.203 | 0.022055015 |
| TRUE | High | Master Protein | -6.1897E+18 | A0A0A0MSS8 | 0 | FALSE | 17 | 7 | 1 | 323 | 36.8 | 7.94 | 38.39 | ENSG00000196139.13 | AKR1C3 | 2.275 | 0.023336651 |
| TRUE | High | Master Protein | -4.7631E+17 | Q15102 | 0 | FALSE | 4 | 1 | 1 | 231 | 25.7 | 6.84 | 6.81 | ENSG00000079462.7 | PAFAH1B3 | 2.582 | 0.029423128 |
| TRUE | High | Master Protein | 4.7529E+18 | A0A3B3IRV5 | 0 | FALSE | 10 | 2 | 2 | 207 | 23.1 | 9.33 | 11.62 |  |  | 0.547 | 0.04087613 |
| TRUE | High | Master Protein | -7.0976E+18 | P09012 | 0.002 | FALSE | 4 | 1 | 1 | 282 | 31.3 | 9.83 | 6.59 | ENSG00000077312.8 | SNRPA | 1.621 | 0.03123744 |
| TRUE | High | Master Protein | -1.994E+17 | P25788 | 0 | FALSE | 5 | 1 | 1 | 255 | 28.4 | 5.33 | 9.61 | ENSG00000100567.12 | PSMA3 | 1.38 | 0.012994885 |
| TRUE | High | Master Protein | 3.65E+17 | Q99880 | 0 | FALSE | 52 | 7 | 1 | 126 | 13.9 | 10.32 | 309.06 | ENSG00000185130.5 | HIST1H2BL | 0.386 | 0.02123506 |
| TRUE | High | Master Protein | 6.23641E+17 | P61981 | 0 | FALSE | 20 | 5 | 3 | 247 | 28.3 | 4.89 | 33.59 | ENSG00000170027.6 | YWHAG | 1.95 | 0.005097262 |
| TRUE | High | Master Protein | 5.62548E+18 | P04179 | 0 | FALSE | 19 | 4 | 4 | 222 | 24.7 | 8.25 | 82.59 |  |  | 0.41 | 0.002832147 |
| TRUE | High | Master Protein | -7.0073E+17 | Q9BQ61 | 0 | FALSE | 8 | 1 | 1 | 176 | 18.4 | 9.44 | 7.05 | ENSG00000123144.10 | C19orf43; TRIR | 2.027 | 0.001382415 |
| TRUE | High | Master Protein | -1.4188E+18 | O75452 | 0 | FALSE | 23 | 6 | 6 | 317 | 35.7 | 8.6 | 23.07 | ENSG00000139547.7 | RDH16 | 0.128 | 0.040972744 |
| TRUE | High | Master Protein | 1.66415E+18 | E9PF18 | 0 | FALSE | 12 | 6 | 6 | 390 | 42.1 | 9.26 | 27.43 | ENSG00000138796.16 |  | 0.384 | 0.001021893 |
| TRUE | High | Master Protein | 4.17224E+18 | Q93088 | 0 | FALSE | 49 | 16 | 12 | 406 | 45 | 7.03 | 268.73 | ENSG00000145692.14 | BHMT | 0.417 | 0.01581065 |
| TRUE | High | Master Protein | -5.5918E+18 | P07327 | 0 | FALSE | 39 | 13 | 3 | 375 | 39.8 | 7.94 | 189.96 | ENSG00000187758.7 | ADH1A | 0.228 | 0.024252039 |
| TRUE | High | Master Protein | 5.03354E+18 | P05062 | 0 | FALSE | 47 | 16 | 14 | 364 | 39.4 | 7.87 | 908.26 | ENSG00000136872.17 | ALDOB | 0.357 | 0.007726679 |
| TRUE | High | Master Protein | 3.26459E+18 | P50440 | 0 | FALSE | 31 | 11 | 11 | 423 | 48.4 | 8.05 | 172.65 | ENSG00000171766.15 | GATM | 0.36 | 0.0004299 |
| TRUE | High | Master Protein | -2.9884E+18 | P23141 | 0 | FALSE | 37 | 17 | 17 | 567 | 62.5 | 6.6 | 296.97 | ENSG00000198848.12 | CES1 | 0.36 | 0.01733028 |
| TRUE | High | Master Protein | 3.61995E+17 | P07355 | 0 | FALSE | 50 | 17 | 8 | 339 | 38.6 | 7.75 | 363.46 | ENSG00000182718.16 | ANXA2 | 4.264 | 0.000225225 |
| TRUE | High | Master Protein | -2.1558E+18 | A0A075B6K4 | 0.002 | FALSE | 7 | 1 | 1 | 115 | 12.4 | 4.83 | 11.36 | ENSG00000211669 | IGLV3-10 | 2.077 | 0.038850223 |
| TRUE | High | Master Protein | -4.7266E+18 | P02743 | 0 | FALSE | 9 | 2 | 2 | 223 | 25.4 | 6.54 | 12.42 | ENSG00000132703.3 | APCS | 0.546 | 0.028399983 |
| TRUE | High | Master Protein | -5.0957E+18 | P09972 | 0 | FALSE | 27 | 9 | 7 | 364 | 39.4 | 6.87 | 134.94 | ENSG00000109107.13 | ALDOC | 3.659 | 0.038448238 |
| TRUE | High | Master Protein | 5.88037E+18 | P02649 | 0 | FALSE | 57 | 16 | 16 | 317 | 36.1 | 5.73 | 147.22 | ENSG00000130203.9 | APOE | 3.65 | 0.013222093 |
| TRUE | High | Master Protein | 6.30029E+18 | H0YL33 | 0 | FALSE | 70 | 10 | 1 | 142 | 16.4 | 5.17 | 255.84 | ENSG00000182718.16 | ANXA2 | 3.176 | 0.020144495 |
| TRUE | High | Master Protein | -4.5338E+17 | P30086 | 0 | FALSE | 41 | 6 | 6 | 187 | 21 | 7.53 | 110.24 | ENSG00000089220.4 | PEBP1 | 0.373 | 0.022298903 |
| TRUE | High | Master Protein | 2.01529E+18 | P24752 | 0 | FALSE | 28 | 11 | 11 | 427 | 45.2 | 8.85 | 63.15 | ENSG00000075239.13 | ACAT1 | 0.448 | 0.004931772 |
| TRUE | High | Master Protein | -4.0826E+18 | P05109 | 0 | FALSE | 28 | 3 | 3 | 93 | 10.8 | 7.03 | 49.53 | ENSG00000143546.9 | S100A8 | 4.852 | 0.010824427 |
| TRUE | High | Master Protein | -4.8749E+18 | O60218 | 0 | FALSE | 7 | 2 | 2 | 316 | 36 | 7.84 | 25.59 | ENSG00000198074.9 | AKR1B10 | 9.344 | 0.019579339 |
| TRUE | High | Master Protein | -1.4471E+18 | P61604 | 0 | FALSE | 75 | 8 | 8 | 102 | 10.9 | 8.92 | 66.76 | ENSG00000115541.10 | HSPE1 | 0.461 | 0.001063745 |
| TRUE | High | Master Protein | 6.74479E+18 | O15173 | 0 | FALSE | 16 | 3 | 2 | 223 | 23.8 | 4.88 | 23.11 | ENSG00000164040.16 | PGRMC2 | 0.372 | 0.043007287 |
| TRUE | High | Master Protein | -8.7757E+18 | Q14914 | 0 | FALSE | 22 | 5 | 5 | 329 | 35.8 | 8.29 | 34.87 | ENSG00000106853.18 | PTGR1 | 0.187 | 0.000328488 |
| TRUE | High | Master Protein | -4.6425E+18 | P38159 | 0 | FALSE | 6 | 3 | 3 | 391 | 42.3 | 10.05 | 21.36 | ENSG00000147274.14 | RBMX | 2.109 | 0.026946195 |
| TRUE | High | Master Protein | 1.57719E+18 | H3BRN4 | 0 | FALSE | 23 | 10 | 10 | 515 | 58.1 | 8.09 | 104.97 | ENSG00000183044.11 | ABAT | 0.42 | 0.001616541 |

Supplementary Table S5: List of differentially expressed proteins between G3 HCC tumor and G3 adjacent non-tomor.

| **Checked** | **Protein FDR Confidence** | **Master** | **Unique Sequence ID** | **Accession** | **Exp. q-value** | **Contaminant** | **Coverage [%]** | **# Peptides** | **# Unique Peptides** | **# AAs** | **MW [kDa]** | **calc. pI** | **Score Sequest HT** | **Gene Symbol** | **G3/G3 non-tumor Abundance Ratio** | **G3/G3 non-tumor Abundance Ratio P-Value:** |
| --- | --- | --- | --- | --- | --- | --- | --- | --- | --- | --- | --- | --- | --- | --- | --- | --- |
| TRUE | High | Master Protein | -2.8E+18 | P68871 | 0 | FALSE | 88 | 11 | 6 | 147 | 16 | 7.28 | 602.36 | HBB | 0.398 | 0.004242853 |
| TRUE | High | Master Protein | -8E+18 | P02042 | 0 | FALSE | 77 | 10 | 2 | 147 | 16 | 8.05 | 323.8 | HBD | 0.224 | 0.023900363 |
| TRUE | High | Master Protein | -6.1E+18 | P01706 | 0.005 | FALSE | 7 | 1 | 1 | 119 | 12.6 | 7.24 | 6.8 | IGLV2-11 | 0.611 | 0.000519972 |
| TRUE | High | Master Protein | -3.2E+18 | P02452 | 0.002 | FALSE | 1 | 1 | 1 | 1464 | 138.9 | 5.8 | 5.66 | COL1A1 | 0.204 | 0.007365565 |
| TRUE | High | Master Protein | 6.73E+18 | Q13838 | 0 | FALSE | 5 | 3 | 3 | 428 | 49 | 5.67 | 8.59 | DDX39B | 2.011 | 0.008151906 |
| TRUE | High | Master Protein | 7.21E+18 | P62942 | 0 | FALSE | 13 | 1 | 1 | 108 | 11.9 | 8.16 | 15.37 | FKBP1A | 1.61 | 0.000142347 |
| TRUE | High | Master Protein | -2E+17 | P25788 | 0 | FALSE | 5 | 1 | 1 | 255 | 28.4 | 5.33 | 9.61 | PSMA3 | 1.441 | 0.006936675 |
| TRUE | High | Master Protein | 2.73E+18 | P08123 | 0 | FALSE | 3 | 3 | 3 | 1366 | 129.2 | 8.95 | 29.59 | COL1A2 | 0.188 | 0.004474487 |
| TRUE | High | Master Protein | -4.6E+18 | P39060 | 0 | FALSE | 3 | 5 | 5 | 1754 | 178.1 | 6.01 | 30.55 | COL18A1 | 4.208 | 0.003945465 |
| TRUE | High | Master Protein | 2.45E+18 | P27487 | 0 | FALSE | 3 | 3 | 3 | 766 | 88.2 | 6.04 | 9.39 | DPP4 | 3.162 | 0.019736127 |
| TRUE | High | Master Protein | 1.58E+18 | H3BRN4 | 0 | FALSE | 23 | 10 | 10 | 515 | 58.1 | 8.09 | 104.97 | ABAT | 0.504 | 0.037327311 |

Supplementary Table S6: List of differentially expressed proteins between G1 and G2 HCC tumor.

| **Checked** | **Protein FDR Confidence** | **Master** | **Unique Sequence ID** | **Accession** | **Exp. q-value** | **Contaminant** | **Coverage [%]** | **# Peptides** | **# Unique Peptides** | **# AAs** | **MW [kDa]** | **calc. pI** | **Score Sequest HT** | **Ensembl Gene ID** | **Gene Symbol** | **G1/G2 Abundance Ratio** | **G1/G2 Abundance Ratio P-Value** |
| --- | --- | --- | --- | --- | --- | --- | --- | --- | --- | --- | --- | --- | --- | --- | --- | --- | --- |
| TRUE | High | Master Protein | -3.7E+18 | H0Y449 | 0 | FALSE | 5 | 1 | 1 | 374 | 42 | 10.43 | 10.88 | ENSG00000065978.18 |  | 1.817 | 0.003277359 |
| TRUE | High | Master Protein | 3.51E+18 | P00167 | 0 | FALSE | 16 | 2 | 2 | 134 | 15.3 | 4.96 | 39.38 | ENSG00000166347.18 | CYB5A | 2.866 | 0.043157977 |
| TRUE | High | Master Protein | 6.51E+18 | Q9NYL4 | 0.002 | FALSE | 3 | 1 | 1 | 201 | 22.2 | 9.39 | 0 | ENSG00000134285.10 | FKBP11 | 2.694 | 0.021237966 |
| TRUE | High | Master Protein | -6.1E+18 | P01706 | 0.005 | FALSE | 7 | 1 | 1 | 119 | 12.6 | 7.24 | 6.8 | ENSG00000211668.2 | IGLV2-11 | 0.606 | 0.000475251 |
| TRUE | High | Master Protein | 6.73E+18 | Q13838 | 0 | FALSE | 5 | 3 | 3 | 428 | 49 | 5.67 | 8.59 | ENSG00000225859.10; ENSG00000215425.11; ENSG00000198563.13; ENSG00000235439.10; ENSG00000230624.10; ENSG00000225073.10; ENSG00000229496.10 | DDX39B | 0.576 | 0.035630383 |
| TRUE | High | Master Protein | -5.4E+18 | A0A0B4J1V0 | 0.005 | FALSE | 6 | 1 | 1 | 119 | 12.9 | 8.62 | 5.15 | ENSG00000211943.2; ENSG00000282290.1 | IGHV3-15 | 0.434 | 0.003730993 |
| TRUE | High | Master Protein | 1.66E+18 | E9PF18 | 0 | FALSE | 12 | 6 | 6 | 390 | 42.1 | 9.26 | 27.43 | ENSG00000138796.16 |  | 2.252 | 0.018882095 |
| TRUE | High | Master Protein | 4.17E+18 | Q93088 | 0 | FALSE | 49 | 16 | 12 | 406 | 45 | 7.03 | 268.73 | ENSG00000145692.14 | BHMT | 2.937 | 0.005418081 |
| TRUE | High | Master Protein | 5.03E+18 | P05062 | 0 | FALSE | 47 | 16 | 14 | 364 | 39.4 | 7.87 | 908.26 | ENSG00000136872.17 | ALDOB | 2.55 | 0.013770826 |
| TRUE | High | Master Protein | -4.5E+17 | P30086 | 0 | FALSE | 41 | 6 | 6 | 187 | 21 | 7.53 | 110.24 | ENSG00000089220.4 | PEBP1 | 2.564 | 0.027508255 |
| TRUE | High | Master Protein | 2.02E+18 | P24752 | 0 | FALSE | 28 | 11 | 11 | 427 | 45.2 | 8.85 | 63.15 | ENSG00000075239.13 | ACAT1 | 1.866 | 0.046609051 |

Supplementary Table S7: List of differentially expressed proteins between G1 and G3 HCC tumor.

| **Checked** | **Protein FDR Confidence** | **Master** | **Unique Sequence ID** | **Accession** | **Exp. q-value** | **Contaminant** | **Coverage [%]** | **# Peptides** | **# Unique Peptides** | **# AAs** | **MW [kDa]** | **calc. pI** | **Score Sequest HT** | **Ensembl Gene ID** | **Gene Symbol** | **G1/G3 Abundance Ratio** | **G1/G3 Abundance Ratio P-Value** |
| --- | --- | --- | --- | --- | --- | --- | --- | --- | --- | --- | --- | --- | --- | --- | --- | --- | --- |
| TRUE | High | Master Protein | -6.9E+18 | P31327 | 0 | FALSE | 25 | 32 | 32 | 1500 | 164.8 | 6.74 | 321.12 | ENSG00000021826.14 | CPS1 | 0.337 | 0.000194211 |
| TRUE | High | Master Protein | -2.8E+18 | P68871 | 0 | FALSE | 88 | 11 | 6 | 147 | 16 | 7.28 | 602.36 | ENSG00000244734.3 | HBB | 3.722 | 1.94031E-05 |
| TRUE | High | Master Protein | -5.2E+18 | P00966 | 0 | FALSE | 7 | 4 | 4 | 412 | 46.5 | 8.02 | 16.47 | ENSG00000130707.17 | ASS1 | 0.354 | 0.004093177 |
| TRUE | High | Master Protein | 2.94E+18 | P10412 | 0 | FALSE | 28 | 7 | 4 | 219 | 21.9 | 11.03 | 77.92 | ENSG00000168298.6 | HIST1H1E | 0.46 | 0.009368779 |
| TRUE | High | Master Protein | -8E+18 | P02042 | 0 | FALSE | 77 | 10 | 2 | 147 | 16 | 8.05 | 323.8 | ENSG00000223609.7 | HBD | 4.85 | 0.018144928 |
| TRUE | High | Master Protein | -6.3E+18 | P06132 | 0 | FALSE | 11 | 3 | 3 | 367 | 40.8 | 6.14 | 19.98 | ENSG00000126088.13 | UROD | 1.739 | 0.015212624 |
| TRUE | High | Master Protein | -3.7E+18 | H0Y449 | 0 | FALSE | 5 | 1 | 1 | 374 | 42 | 10.43 | 10.88 | ENSG00000065978.18 |  | 1.575 | 0.013242255 |
| TRUE | High | Master Protein | 3.51E+18 | P00167 | 0 | FALSE | 16 | 2 | 2 | 134 | 15.3 | 4.96 | 39.38 | ENSG00000166347.18 | CYB5A | 4.257 | 0.011317582 |
| TRUE | High | Master Protein | 6.51E+18 | Q9NYL4 | 0.002 | FALSE | 3 | 1 | 1 | 201 | 22.2 | 9.39 | 0 | ENSG00000134285.10 | FKBP11 | 4.085 | 0.000512404 |
| TRUE | High | Master Protein | 5.71E+18 | P08574 | 0 | FALSE | 8 | 3 | 3 | 325 | 35.4 | 9 | 27.26 | ENSG00000179091.4 | CYC1 | 2.56 | 0.001981509 |
| TRUE | High | Master Protein | -6.1E+18 | P01706 | 0.005 | FALSE | 7 | 1 | 1 | 119 | 12.6 | 7.24 | 6.8 | ENSG00000211668.2 | IGLV2-11 | 1.439 | 0.002748866 |
| TRUE | High | Master Protein | 1.33E+18 | P07099 | 0 | FALSE | 32 | 14 | 14 | 455 | 52.9 | 7.25 | 273.83 | ENSG00000143819.12 | EPHX1 | 4.743 | 0.000956538 |

Supplementary Table S8: List of differentially expressed proteins between G2 and G3 HCC tumor.

| **Checked** | **Protein FDR Confidence** | **Master** | **Unique Sequence ID** | **Accession** | **Exp. q-value** | **Contaminant** | **Coverage [%]** | **# Peptides** | **# Unique Peptides** | **# AAs** | **MW [kDa]** | **calc. pI** | **Score Sequest HT** | **Ensembl Gene ID** | **Gene Symbol** | **G2/G3 Abundance Ratio** | **G2/G3 Abundance Ratio P-Value** |
| --- | --- | --- | --- | --- | --- | --- | --- | --- | --- | --- | --- | --- | --- | --- | --- | --- | --- |
| TRUE | High | Master Protein | -6.948E+18 | P31327 | 0 | FALSE | 25 | 32 | 32 | 1500 | 164.8 | 6.74 | 321.12 | ENSG00000021826.14 | CPS1 | 0.406 | 0.003740719 |
| TRUE | High | Master Protein | -2.762E+18 | P68871 | 0 | FALSE | 88 | 11 | 6 | 147 | 16 | 7.28 | 602.36 | ENSG00000244734.3 | HBB | 2.517 | 0.010314316 |
| TRUE | High | Master Protein | -5.234E+18 | P00966 | 0 | FALSE | 7 | 4 | 4 | 412 | 46.5 | 8.02 | 16.47 | ENSG00000130707.17 | ASS1 | 0.381 | 0.009378623 |
| TRUE | High | Master Protein | -6.265E+18 | P06132 | 0 | FALSE | 11 | 3 | 3 | 367 | 40.8 | 6.14 | 19.98 | ENSG00000126088.13 | UROD | 2.082 | 0.001511711 |
| TRUE | High | Master Protein | -6.086E+18 | P01706 | 0.005 | FALSE | 7 | 1 | 1 | 119 | 12.6 | 7.24 | 6.8 | ENSG00000211668.2 | IGLV2-11 | 2.372 | 1.87503E-05 |
| TRUE | High | Master Protein | -5.375E+18 | A0A0B4J1V0 | 0.005 | FALSE | 6 | 1 | 1 | 119 | 12.9 | 8.62 | 5.15 | ENSG00000211943.2; ENSG00000282290.1 | IGHV3-15 | 2.168 | 0.00555852 |
| TRUE | High | Master Protein | -8.842E+18 | P69905 | 0 | FALSE | 62 | 6 | 6 | 142 | 15.2 | 8.68 | 643.13 | ENSG00000206172.8; ENSG00000188536.12 | HBA2; HBA1 | 3.954 | 0.000406932 |
| TRUE | High | Master Protein | 6.761E+18 | Q14032 | 0 | FALSE | 8 | 4 | 4 | 418 | 46.3 | 6.99 | 20.55 | ENSG00000276559.2; ENSG00000136881.11 | BAAT | 0.35 | 0.024531765 |
